# Supplementary material
Source: PubMed Central journal article supplement (PMC5845791)
Supplement: NIHMS944597-supplement-Supplemental.pdf [file NIHMS944597-supplement-Supplemental.pdf]

## Supplementary Material

| SNP        | BP (GRCh37) | CHR | MAF   | P (SNP x CLES interaction) |            | Gene (dist to SNP)  |
|------------|-------------|-----|-------|----------------------------|------------|---------------------|
|            |             |     |       | CLES 0 vs ≥2               | Continuous |                     |
| rs3027681  | 111,075,945 | X   | 0.027 | 1.19E-06                   | 2.33E-05   | TRPC5               |
| rs585433   | 75,292,601  | 11  | 0.457 | 2.91E-06                   | 4.04E-05   | MAP6(5kb)           |
| rs12268100 | 86,360,942  | 10  | 0.129 | 7.62E-06                   | 4.60E-05   | RPS3AP5(39kb)       |
| rs17549584 | 103,507,608 | 12  | 0.021 | 7.98E-06                   | 1.24E-05   | ASCL1(153kb)        |
| rs4865116  | 57,398,107  | 4   | 0.036 | 1.23E-05                   | 1.67E-03   | ARL9(8kb)           |
| rs9669404  | 46,798,963  | 12  | 0.309 | 1.35E-05                   | 1.77E-05   | LOC100288798        |
| rs17085464 | 27,912,201  | 13  | 0.017 | 1.75E-05                   | 3.02E-06   | RASL11A(64kb)       |
| rs1206919  | 9,775,340   | 6   | 0.299 | 2.36E-05                   | 2.05E-04   | OFCC1               |
| rs17301325 | 68,789,181  | X   | 0.233 | 3.04E-05                   | 4.17E-04   | FAM155B(36kb)       |
| rs13236030 | 124,172,590 | 7   | 0.133 | 3.12E-05                   | 3.75E-05   | RPS2P31(51kb)       |
| rs12368779 | 1,982,151   | 12  | 0.123 | 3.62E-05                   | 1.12E-04   | CACNA2D4            |
| rs11134781 | 172,672,585 | 5   | 0.048 | 5.04E-05                   | 6.84E-04   | NKX2-5(10kb)        |
| rs4522917  | 187,934,682 | 4   | 0.030 | 5.20E-05                   | 1.13E-03   | MRPS36P2(112kb)     |
| rs12096159 | 49,164,735  | 1   | 0.046 | 5.66E-05                   | 3.53E-04   | AGBL4               |
| rs12909532 | 35,439,427  | 15  | 0.293 | 5.68E-05                   | 3.25E-04   | LOC390572(25kb)     |
| rs6881493  | 163,615,094 | 5   | 0.425 | 5.81E-05                   | 4.98E-04   | LOC100507193(108kb) |
| rs12376088 | 37,597,705  | 9   | 0.297 | 6.51E-05                   | 8.90E-05   | TOMM5(5kb)          |
| rs8030082  | 97,521,191  | 15  | 0.289 | 6.69E-05                   | 3.46E-04   | SPATA8(192kb)       |
| rs7313341  | 113,167,134 | 12  | 0.434 | 7.41E-05                   | 7.07E-03   | MIR1302-1(34kb)     |
| rs7311216  | 54,534,592  | 12  | 0.445 | 7.48E-05                   | 2.49E-04   | LOC400043(7kb)      |
| rs7131120  | 85,690,012  | 11  | 0.215 | 8.00E-05                   | 1.01E-03   | PICALM              |
| rs242037   | 3,780,337   | 12  | 0.240 | 8.78E-05                   | 7.67E-04   | EFCAB4B             |
| rs2289741  | 41,820,200  | 15  | 0.048 | 9.24E-05                   | 2.69E-03   | RPAP1               |
| rs1547189  | 27,665,405  | 13  | 0.191 | 9.32E-05                   | 9.34E-04   | USP12               |
| rs2920692  | 120,265,850 | 2   | 0.019 | 9.36E-05                   | 4.53E-04   | SCTR                |
| rs7302283  | 63,576,379  | 12  | 0.016 | 9.67E-05                   | 1.51E-03   | AVPR1A(29kb)        |
| rs621514   | 110,733,794 | 1   | 0.353 | 1.07E-04                   | 2.60E-03   | SLC6A17             |
| rs12125506 | 64,509,025  | 1   | 0.040 | 1.11E-04                   | 1.43E-03   | ROR1                |
| rs891304   | 44,532,174  | 11  | 0.140 | 1.21E-04                   | 8.02E-04   | LOC646535(29kb)     |
| rs10039368 | 136,629,854 | 5   | 0.042 | 1.23E-04                   | 2.73E-03   | SPOCK1              |
| rs7861973  | 85,949,206  | 9   | 0.126 | 1.27E-04                   | 1.74E-04   | FRMD3               |
| rs1218099  | 117,403,331 | X   | 0.150 | 1.34E-04                   | 3.20E-04   | WDR44(76kb)         |
| rs13357230 | 90,411,072  | 5   | 0.049 | 1.34E-04                   | 8.53E-04   | GPR98               |
| rs4366546  | 18,376,194  | 12  | 0.243 | 1.35E-04                   | 1.52E-02   | PIK3C2G(38kb)       |
| rs12350378 | 26,165,173  | 9   | 0.108 | 1.37E-04                   | 1.28E-04   | LOC100506422(46kb)  |
| rs13402330 | 103,512,292 | 2   | 0.200 | 1.39E-04                   | 6.59E-04   | TMEM182(78kb)       |
| rs16871518 | 3,254,413   | 5   | 0.264 | 1.46E-04                   | 5.13E-04   | LOC285577(162kb)    |
| rs2838106  | 43,150,474  | 21  | 0.317 | 1.46E-04                   | 1.32E-03   | RIPK4(9kb)          |
| rs1415823  | 109,579,442 | 13  | 0.033 | 1.48E-04                   | 2.59E-04   | MYO16               |
| rs12598602 | 51,903,866  | 16  | 0.336 | 1.49E-04                   | 8.96E-04   | LOC388276(156kb)    |
| rs9903232  | 55,964,616  | 17  | 0.458 | 1.53E-04                   | 3.17E-04   | CUEDC1              |
| rs2242761  | 37,024,845  | 21  | 0.338 | 1.58E-04                   | 6.07E-04   | EZH2P1(52kb)        |
| rs12669446 | 39,046,908  | 7   | 0.357 | 1.68E-04                   | 1.55E-04   | POU6F2              |
| rs2526833  | 17,723,126  | 1   | 0.354 | 1.68E-04                   | 1.19E-04   | PADI6               |
| rs9303174  | 3,342,002   | 17  | 0.333 | 1.69E-04                   | 2.00E-04   | SPATA22(1kb)        |

**Supplementary Table 2. Genes annotated with molecular function "calcium channel activity" (GO:0005262)**

| <b>Symbol</b>   | <b>Gene</b>                                                               |
|-----------------|---------------------------------------------------------------------------|
| CACNA2D2        | calcium channel, voltage-dependent, alpha 2/delta subunit 2               |
| <b>CACNA2D4</b> | <b>calcium channel, voltage-dependent, alpha 2/delta subunit 4</b>        |
| CACNB2          | calcium channel, voltage-dependent, beta 2 subunit                        |
| CALHM1          | calcium homeostasis modulator 1                                           |
| CATSPER2..4     | cation channels, sperm associated 2-4                                     |
| CHRNA9..10      | cholinergic receptors, nicotinic, alpha 9-10                              |
| CLCA3P          | chloride channel accessory 3 (pseudogene)                                 |
| CUL5            | cullin 5                                                                  |
| <b>EFCAB4B*</b> | <b>EF-hand calcium binding domain 4B</b>                                  |
| GPM6A           | glycoprotein M6A                                                          |
| <b>GPR98*</b>   | <b>G protein-coupled receptor 98</b>                                      |
| GRIN1           | glutamate receptor, ionotropic, N-methyl D-aspartate 1                    |
| GRIN2A..2B      | glutamate receptors, ionotropic, N-methyl D-aspartate 2A-2B               |
| GRIN3A..3B      | glutamate receptors, ionotropic, N-methyl-D-aspartate 3A-3B               |
| HTR2B           | 5-hydroxytryptamine (serotonin) receptor 2B                               |
| ITPR1           | inositol 1,4,5-triphosphate receptor, type 1                              |
| ITPR3           | inositol 1,4,5-triphosphate receptor, type 3                              |
| MS4A2           | membrane-spanning 4-domains, subfamily A, member 2                        |
| <b>PADI6*</b>   | <b>peptidyl arginine deiminase, type VI</b>                               |
| PKD2            | polycystic kidney disease 2 (autosomal dominant)                          |
| SLC24A2         | solute carrier family 24 (sodium/potassium/calcium exchanger), member 2   |
| TMEM37          | transmembrane protein 37                                                  |
| TPCN1..2        | two pore segment channels 1-2                                             |
| TRPA1           | transient receptor potential cation channel, subfamily A, member 1        |
| TRPC1           | transient receptor potential cation channel, subfamily C, member 1        |
| TRPC3           | transient receptor potential cation channel, subfamily C, member 3        |
| <b>TRPC5</b>    | <b>transient receptor potential cation channel, subfamily C, member 5</b> |
| TRPC7           | transient receptor potential cation channel, subfamily C, member 7        |
| TRPM1..8        | transient receptor potential cation channel, subfamily M, members 1-8     |
| TRPV1..6        | transient receptor potential cation channel, subfamily V, members 1-6     |

Genes in **bold** are among the AAO/life events interaction results we report here

\* = genes from overlapping molecular function "calcium ion binding" (GO:0005509)

INRICH p-value=0.001 for GO:0005262; p=0.02 for GO:0005509

## CHILDHOOD LIFE EVENTS SCALE

CLES  
15-Feb-2005

Page 1

DATE:    —   —      
Month Day Year

| SUBJECT ID           |                      |                      |   |                      |                      |                      |                      |   |                      |                      |                      |
|----------------------|----------------------|----------------------|---|----------------------|----------------------|----------------------|----------------------|---|----------------------|----------------------|----------------------|
| SITE ID              |                      |                      | — | FAMILY ID            |                      |                      |                      | — | INDIVIDUAL ID        |                      |                      |
| <input type="text"/> | <input type="text"/> | <input type="text"/> |   | <input type="text"/> | <input type="text"/> | <input type="text"/> | <input type="text"/> |   | <input type="text"/> | <input type="text"/> | <input type="text"/> |

Please look at the following events that may occur during childhood. Did you have any of these things happen to you between the ages of **3 and 12**? Put one check mark per event in the box to indicate your answer.

| Event                                                                             | No                       | Yes                      | Yes, but at another age  | Comments |
|-----------------------------------------------------------------------------------|--------------------------|--------------------------|--------------------------|----------|
| 1. Death of a parent                                                              | <input type="checkbox"/> | <input type="checkbox"/> | <input type="checkbox"/> |          |
| 2. Death of a sister or brother                                                   | <input type="checkbox"/> | <input type="checkbox"/> | <input type="checkbox"/> |          |
| 3. Beginning of a chronic illness (e.g., rheumatoid arthritis, juvenile diabetes) | <input type="checkbox"/> | <input type="checkbox"/> | <input type="checkbox"/> |          |
| 4. Hospitalized for a long period (a month or more)                               | <input type="checkbox"/> | <input type="checkbox"/> | <input type="checkbox"/> |          |
| 5. Permanent injury or disability (e.g., loss of a limb)                          | <input type="checkbox"/> | <input type="checkbox"/> | <input type="checkbox"/> |          |
| 6. Were you physically abused by any one?                                         | <input type="checkbox"/> | <input type="checkbox"/> | <input type="checkbox"/> |          |
| <b>If yes to 6:</b>                                                               |                          |                          |                          |          |
| 6.a) Did you require medical treatment?                                           | <input type="checkbox"/> | <input type="checkbox"/> | <input type="checkbox"/> |          |
| 6.b) Was this reported to the authorities (e.g., police, social services)?        | <input type="checkbox"/> | <input type="checkbox"/> | <input type="checkbox"/> |          |

---

7. Did someone threaten to seriously injure or kill you?             

---

**If yes to 7:**  
7.a) Did they use a weapon?             

---

8. Did you have to leave your home unexpectedly (e.g., foreclosure by the bank)?             

---

9. Was your life seriously changed unexpectedly (e.g., loss of parent's job)?             

---
